# Supplementary material for: IRF5 Is a Specific Marker of Inflammatory MacrophagesIn Vivo
Source: Hindawi journal article supplement (doi:10.1155/2013/245804), 2013-01-01
Supplement: f1 [file 245804.f1.pdf]

**Figure S1**

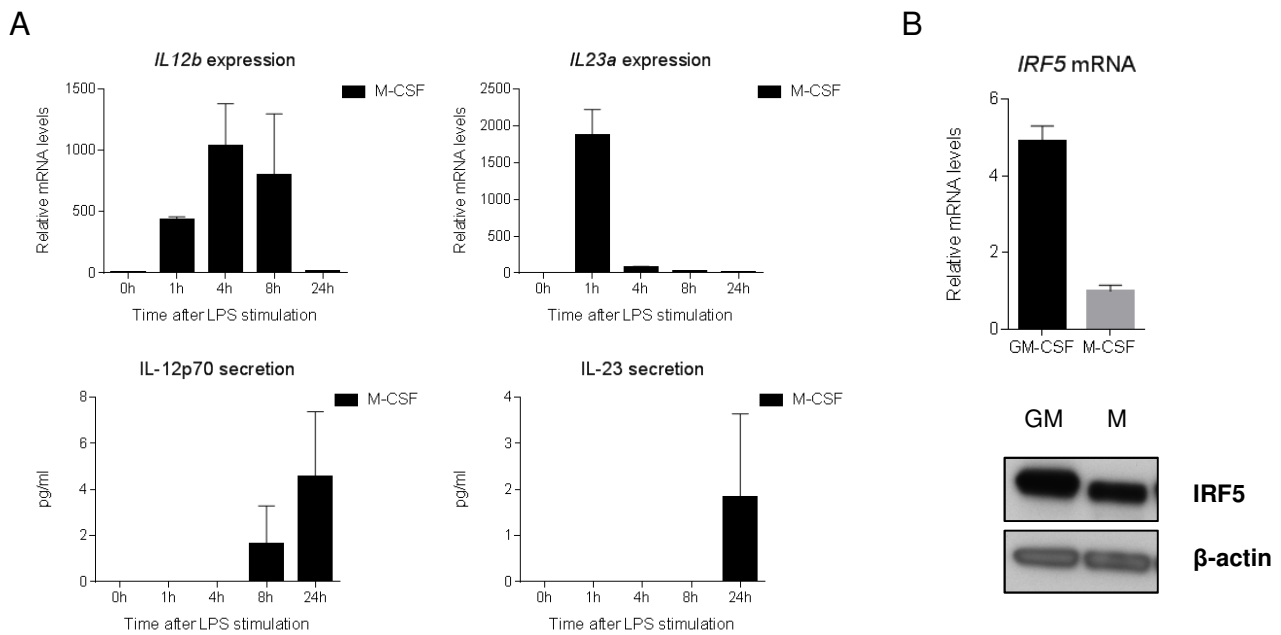

**FIGURE S1: Pro-inflammatory cytokine expression in M-BMDMs and IRF5 expression in samples used for intracellular IRF5 staining.**

BMDMs were differentiated with GM-CSF (20ng/ml) or M-CSF (100ng/ml) for eight days. **A.** M-CSF differentiated cells were challenged with LPS for the indicated time periods. At each time point RNA (top panel) and supernatants (bottom panel) were collected. Error bars represent the standard error for n=5. This data is the same as in Figure 1A but excluding the GM-CSF data set. **B.** *Irf5* transcript levels were measured by Real-time PCR. Error bars represent the standard deviation of experimental duplicates. Protein levels of IRF5 and β-actin were determined by western blot. RNA and protein samples were from an experiment used to generate data for Fig 2C.
